# Supplementary material for: Quality Evaluation of Tetrastigmae Radix from Two Different Habitats Based on Simultaneous Determination of Multiple Bioactive Constituents Combined with Multivariate Statistical Analysis
Source: MDPI journal article supplement (doi:10.3390/molecules27154813), 2022-07-27
Supplement: s1 [file s1]

# Quality Evaluation of Tetrastigmae Radix from Two Different Habitats Based on Simultaneous Determination of Multiple Bioactive Constituents Combined with Multivariate Statistical Analysis

Haijie Chen<sup>1</sup>, Yongyi Zhou<sup>1</sup>, Jia Xue<sup>1</sup>, Jiahuan Yuan<sup>1</sup>, Zhichen Cai<sup>1</sup>, Nan Wu<sup>1</sup>, Lisi Zou<sup>1,\*</sup>, Shengxin Yin<sup>1</sup>, Wei Yang<sup>1</sup>, Xunhong Liu<sup>1,2,\*</sup>, Jianming Cheng<sup>1,2</sup> and Li Tang<sup>1</sup>

## Supplementary materials

### Supplementary figures

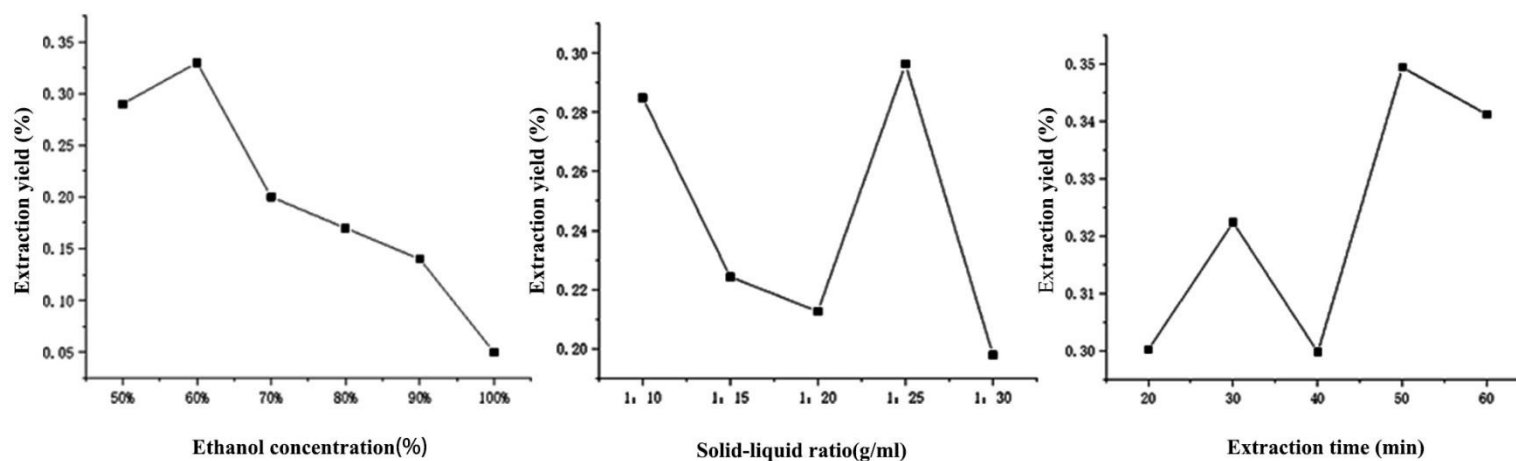

**Figure S1.** Effects of ethanol concentration, solid-liquid ratio, and extraction time on extraction yields of four constituents. ("extraction yield (%) = weight of analyte (mg) / weight of dried sample (g) × 100%")

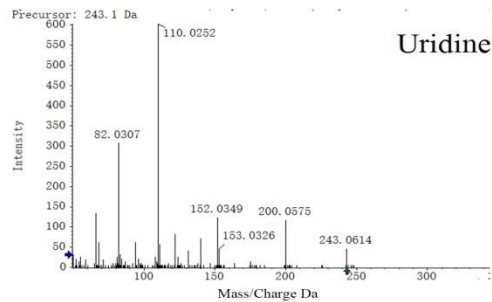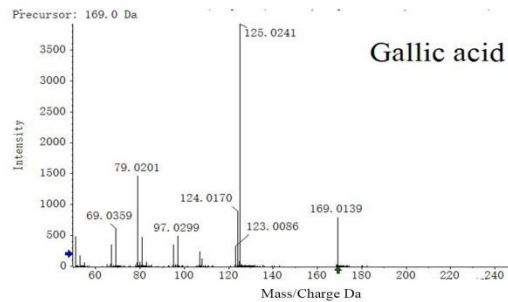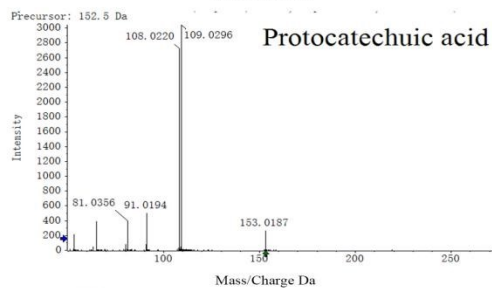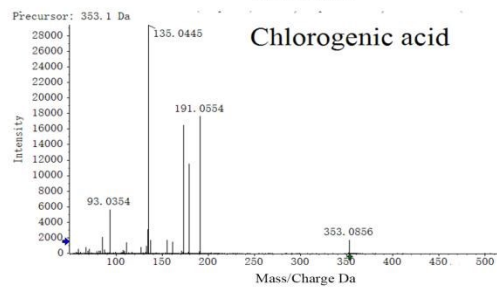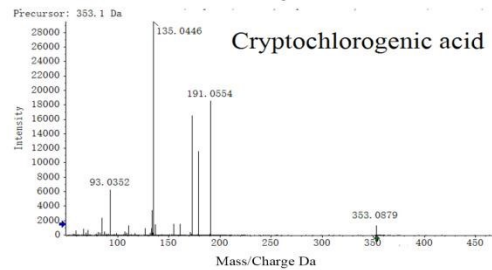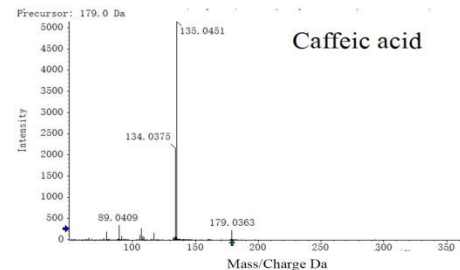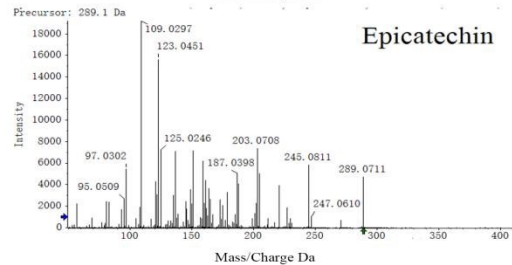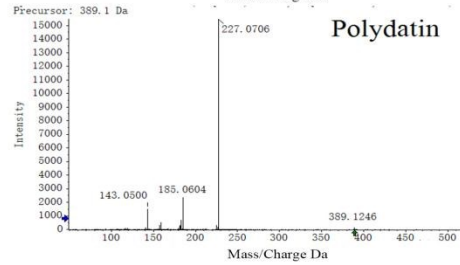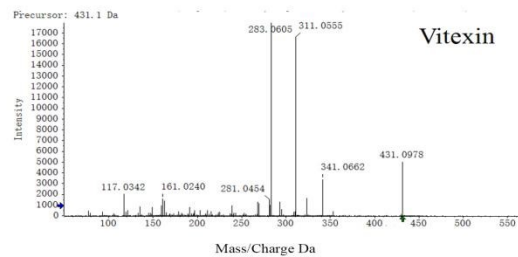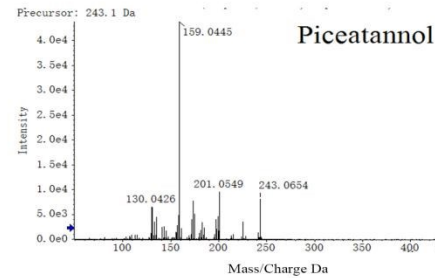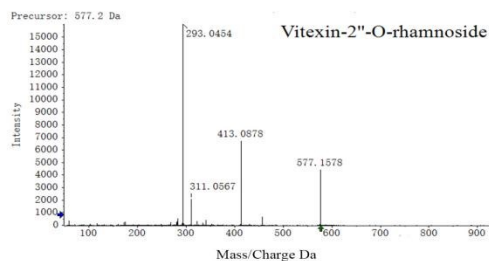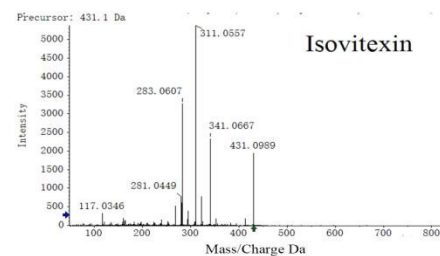

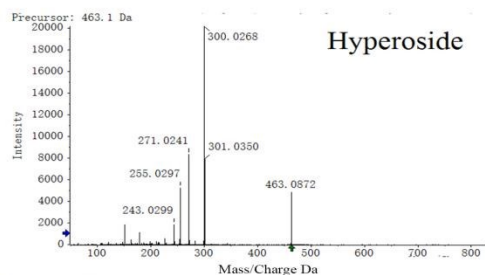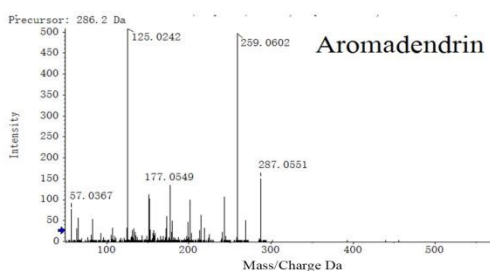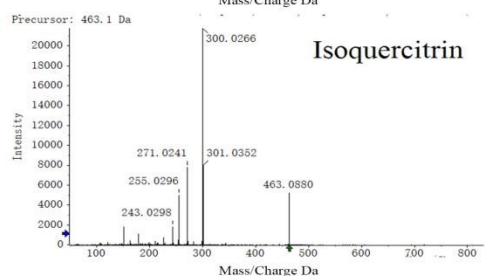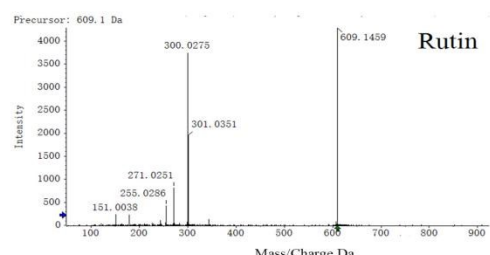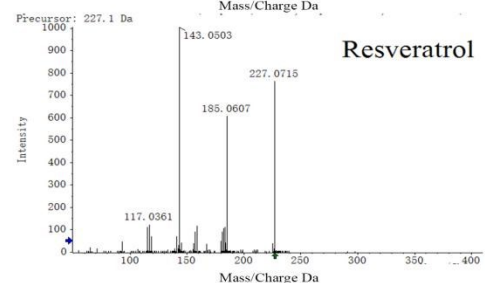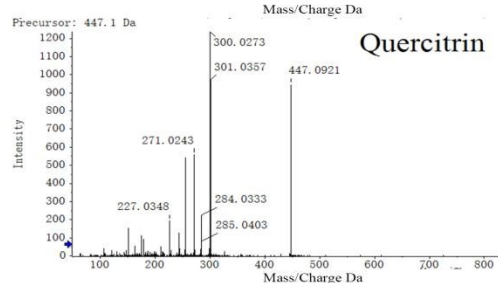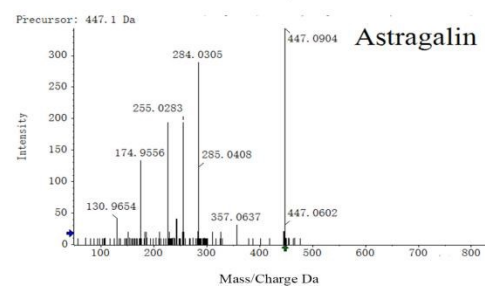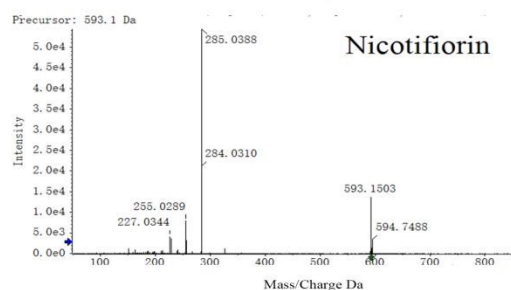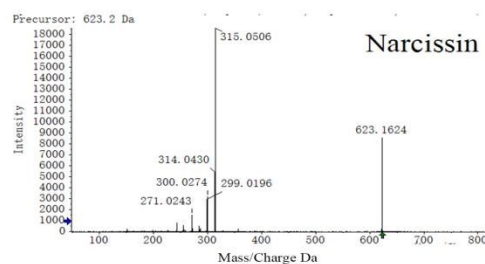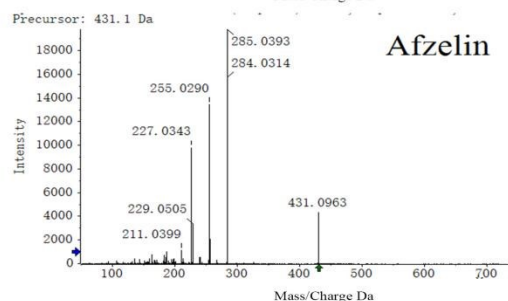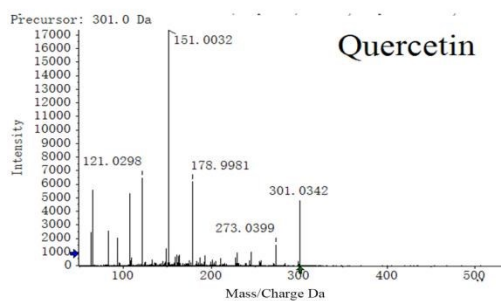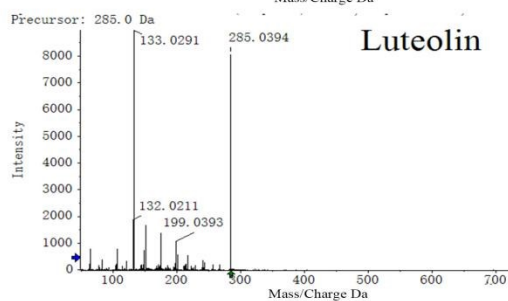

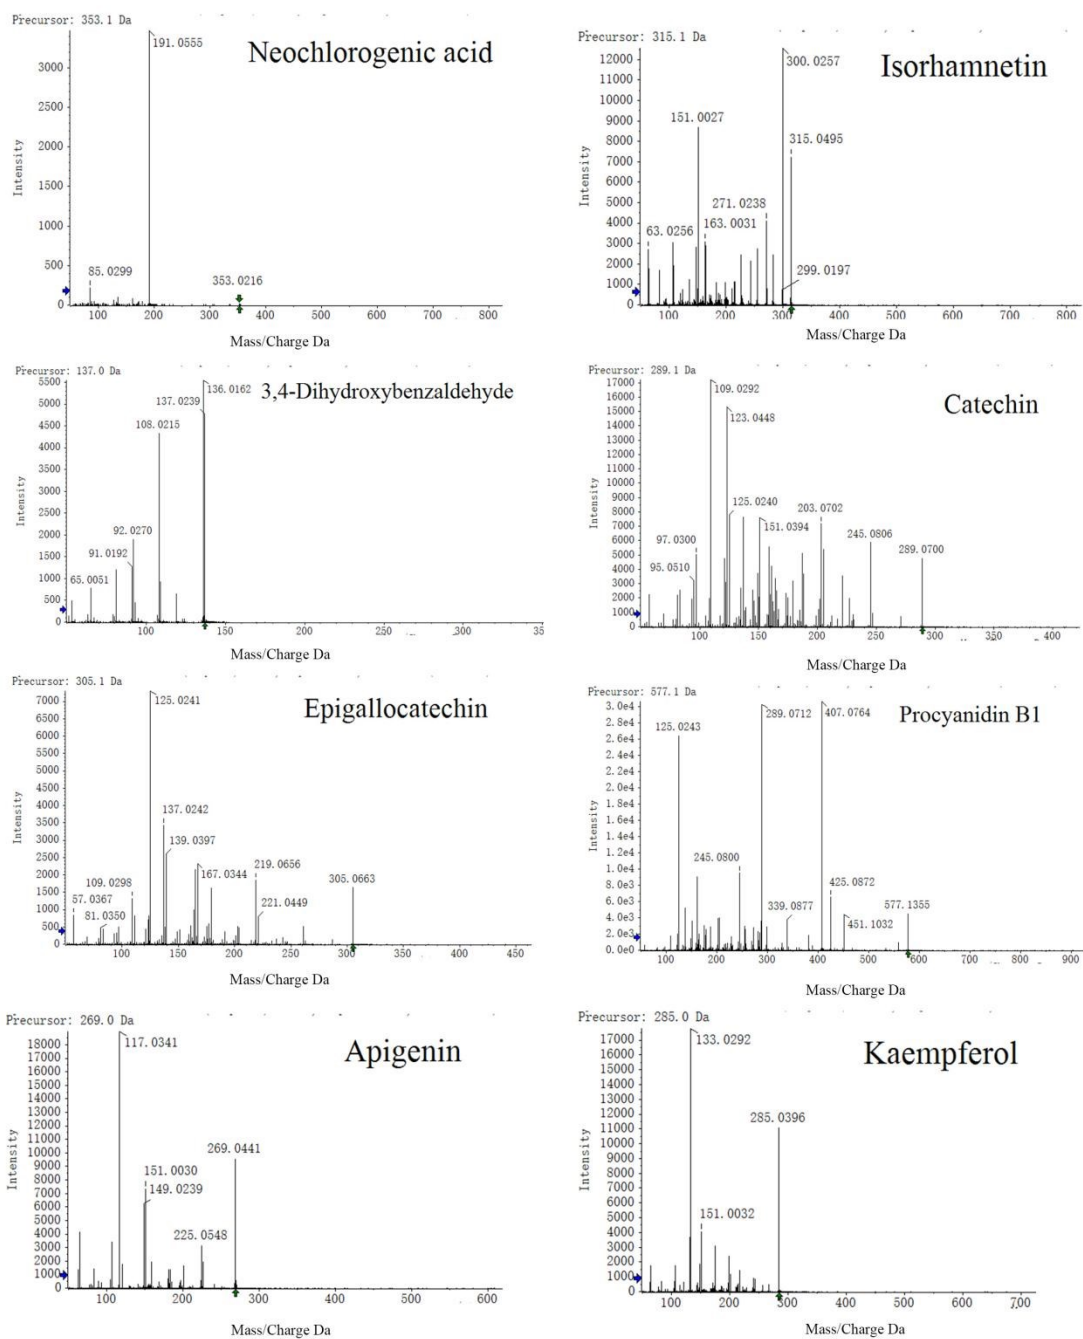

Figure S2. The MS spectra of 32 constituents in negative ion modes.

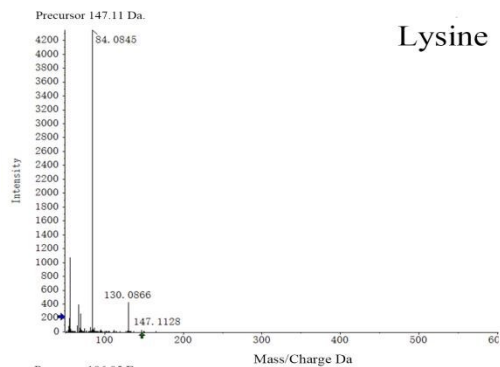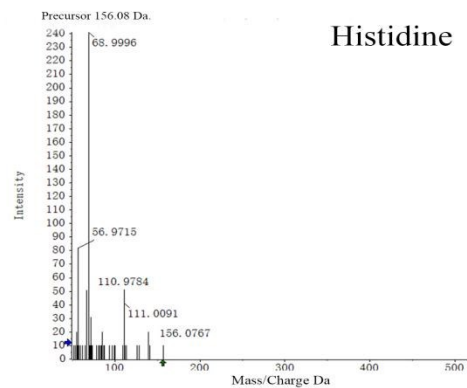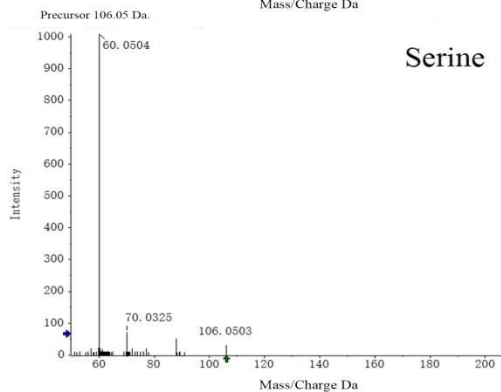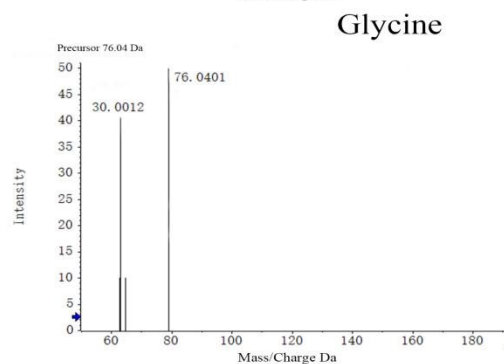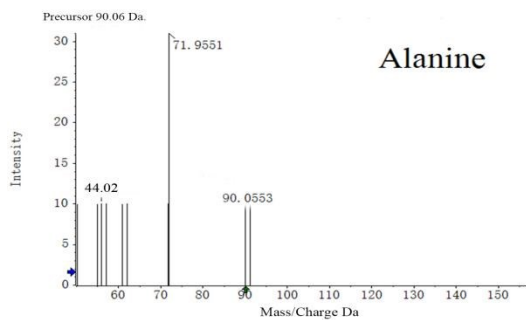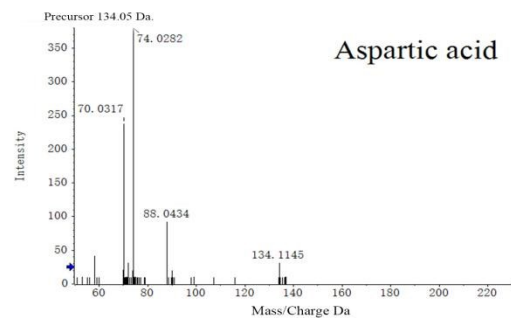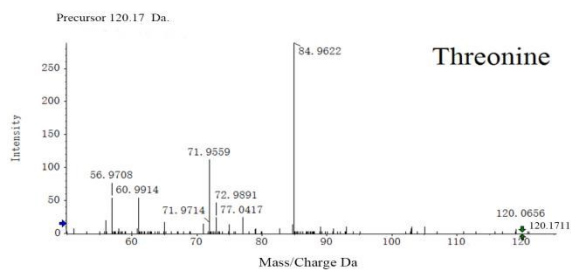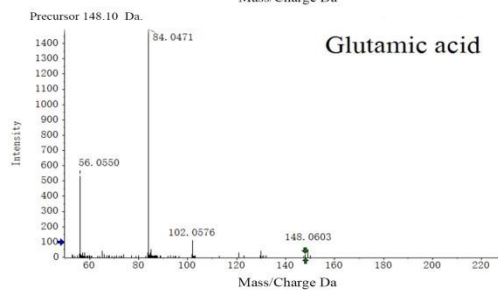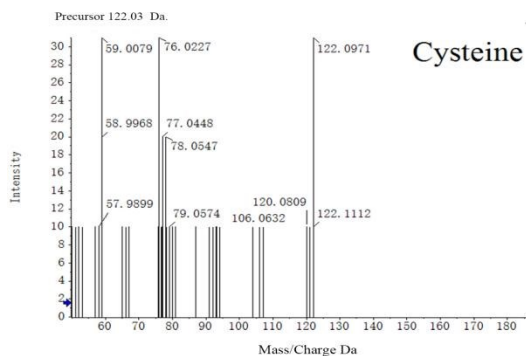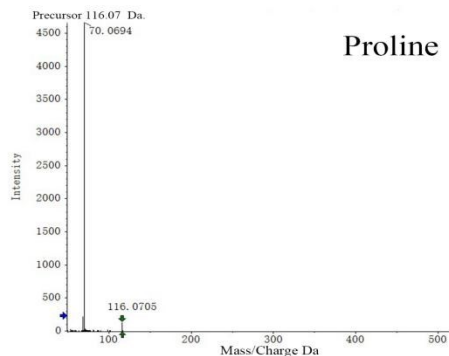

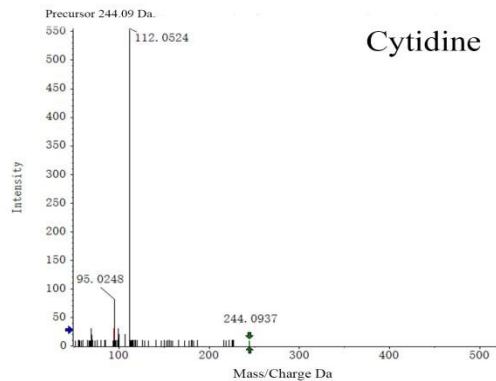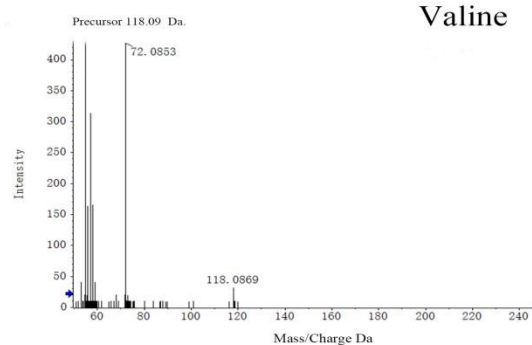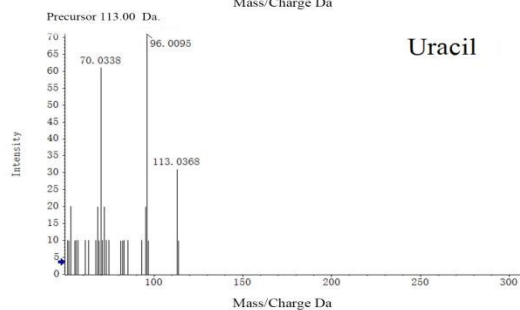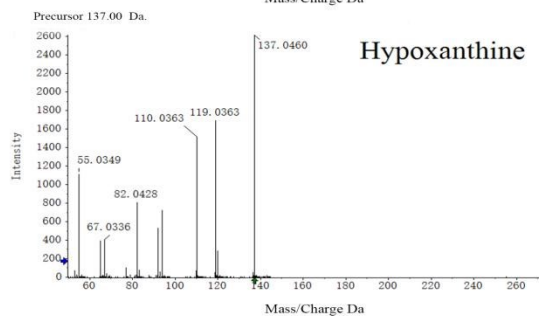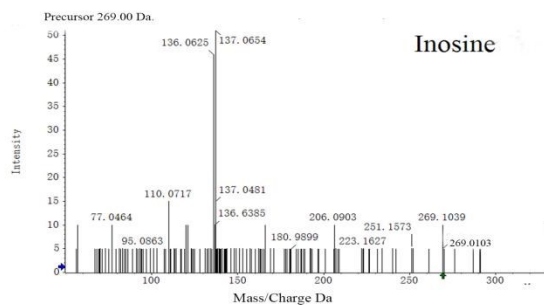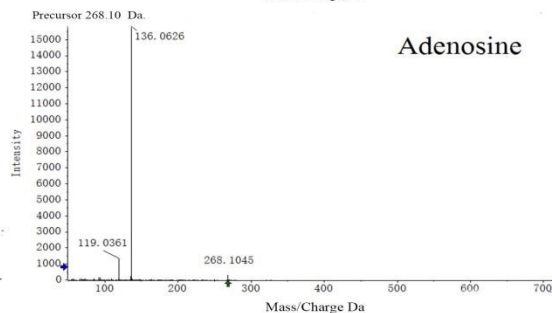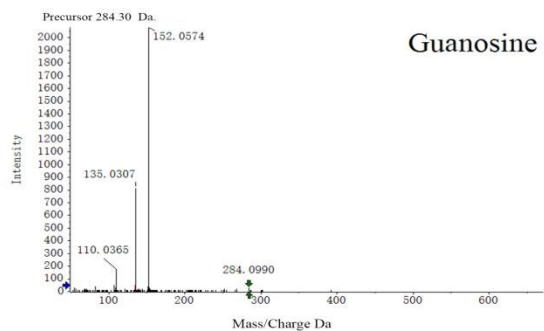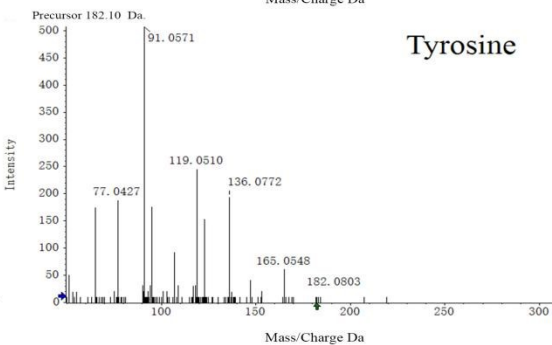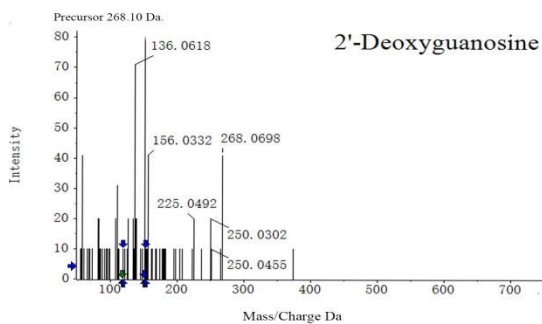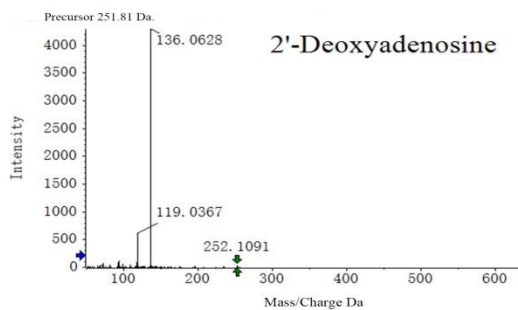

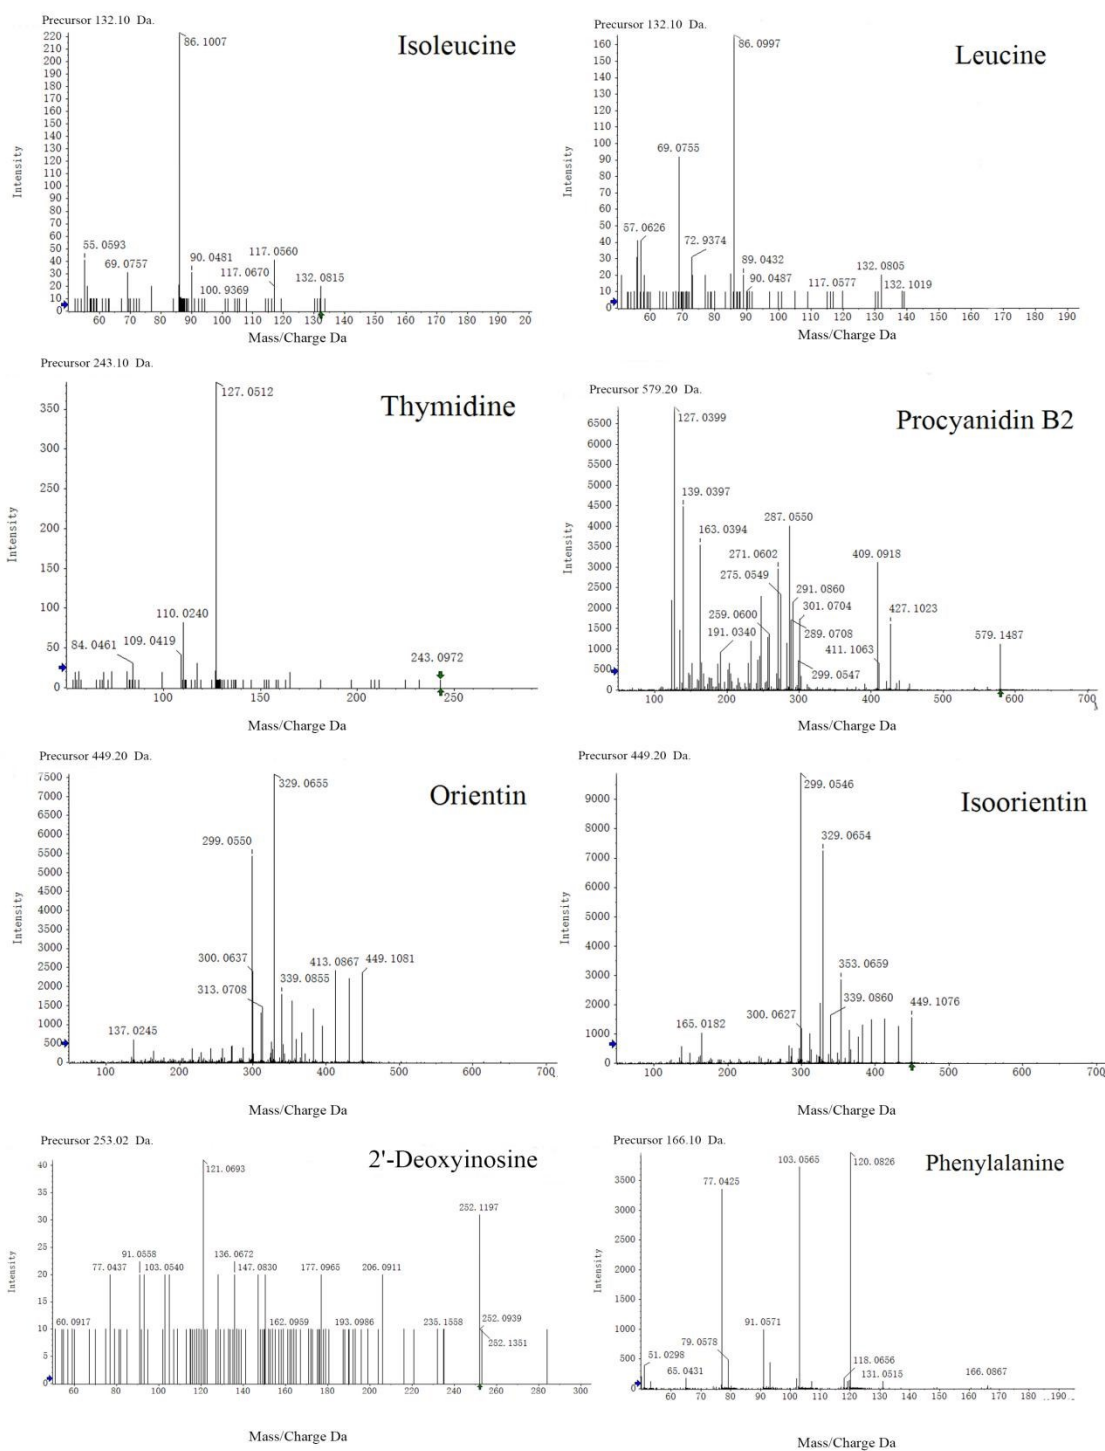

**Figure S3.** The MS spectra of 28 constituents in positive ion modes.

*Supplementary tables*

Table S1. Contents of 60 constituents in samples. (μg/g, n = 3)

| No. | Constituents      | S1     | S2     | S3     | S4     | S5      | S6     | S7     | S8     | S9     | S10    | S11    | S12    | S13    | S14    | S15    |
|-----|-------------------|--------|--------|--------|--------|---------|--------|--------|--------|--------|--------|--------|--------|--------|--------|--------|
| 1   | Lysine            | 25.99  | 166.10 | 277.56 | 202.58 | 224.87  | 169.08 | 432.67 | 41-    | 217.50 | 25-    | 244.17 | 243.95 | 249.38 | 400.24 | 116.77 |
| 2   | Histidine         | 3.85   | 85.30  | 83.77  | 84.50  | 58.46   | 45.67  | 56.27  | 71.38  | 28.50  | 24.08  | 22.83  | 38.28  | 34.50  | 136.83 | 61.51  |
| 3   | Glycine           | 4.67   | 19.41  | 7.35   | 14.85  | 15.39   | 8.43   | 14.91  | 13.98  | 10.30  | 9.28   | 9.32   | 17.01  | 14.55  | 2.98   | 9.20   |
| 4   | Serine            | 18.92  | 33.77  | 81.52  | 53.25  | 66.21   | 47.88  | 65.28  | 65.08  | 29.75  | 25.00  | 26.67  | 37.03  | 38.88  | 53.28  | 40.51  |
| 5   | Alanine           | 277.39 | 757.95 | 635.13 | 696.25 | 394.76  | 524.17 | 550.22 | 443.33 | 169.25 | 143.25 | 136.00 | 540.43 | 585.83 | 580.35 | 525.11 |
| 6   | Aspartic acid     | 14.64  | 49.53  | 44.26  | 46.88  | 102.94  | 95.13  | 81.03  | 68.67  | 28.75  | 36.00  | 33.92  | 48.29  | 54.38  | 86.55  | 37.51  |
| 7   | Threonine         | 24.44  | 31.52  | 28.51  | 3-     | 25.48   | 25.37  | 110.29 | 111.00 | 13.15  | 11.15  | 12.23  | 42.78  | 36.79  | 138.33 | 96.52  |
| 8   | Glutamic acid     | 7.60   | 47.78  | 61.51  | 54.63  | 107.19  | 109.25 | 34.26  | 35.00  | 17.85  | 31.50  | 28.50  | 51.29  | 44.01  | 17.19  | 2.31   |
| 9   | Cysteine          | 0.19   | 0.54   | 0.59   | 0.56   | 4.37    | 4.47   | 1.95   | 1.52   | 2.73   | 1.84   | 1.86   | 0.54   | 0.49   | 0.49   | 1.40   |
| 10  | Proline           | 169.18 | 785.47 | 730.15 | 757.50 | 1226.76 | 128-   | 467.69 | 475.83 | 262.50 | 307.50 | 284.17 | 763.11 | 718.33 | 435.26 | 199.54 |
| 11  | Cytidine          | 3.32   | 5.50   | 2.15   | 3.82   | 18.26   | 17.53  | 7.75   | 6.64   | 2.26   | 7.08   | 5.25   | 5.05   | 5.45   | 11.11  | 1.87   |
| 12  | Uracil            | 3.42   | 7.78   | 7.80   | 7.79   | 12.59   | 14.35  | 29.26  | 22.64  | 10.73  | 14.43  | 10.65  | 6.51   | 9.15   | 17.89  | 7.73   |
| 13  | Valine            | 46.98  | 66.79  | 63.01  | 64.88  | 82.45   | 119.08 | 53.27  | 71.42  | 66.75  | 45.75  | 54.58  | 68.05  | 52.88  | 51.03  | 99.02  |
| 14  | Hypoxanthine      | 35.74  | 40.77  | 29.51  | 35.13  | 28.98   | 33.67  | 47.02  | 48.08  | 13.60  | 8.60   | 11.03  | 23.87  | 32.70  | 37.27  | 38.26  |
| 15  | Uridine           | 1-     | 23.64  | 25.51  | 24.56  | 18.84   | 27.29  | 24.56  | 26.99  | 18.90  | 11.50  | 14.05  | 8.01   | 9.48   | 29.77  | 13.58  |
| 16  | Adenosine         | 32.74  | 153.09 | 120.52 | 136.75 | 39.98   | 59.00  | 112.04 | 96.75  | 31.25  | 23.03  | 27.59  | 83.57  | 69.25  | 18.44  | 7.38   |
| 17  | 2'-Deoxyadenosine | 0.10   | 0.08   | 0.10   | 0.09   | 0.09    | 0.09   | 0.17   | 0.14   | 0.08   | 0.10   | 0.11   | 0.10   | 0.10   | 0.07   | 0.07   |
| 18  | Tyrosine          | 19.89  | 18.79  | 15.15  | 16.96  | 84.20   | 73.75  | 34.01  | 27.13  | 15.05  | 41.50  | 32.02  | 29.02  | 26.40  | 36.27  | 23.28  |
| 19  | Guanosine         | 7.17   | 14.33  | 5.95   | 10.14  | 24.64   | 23.53  | 10.93  | 9.70   | 4.88   | 20.73  | 15.49  | 16.71  | 12.94  | 12.46  | 4.50   |
| 20  | Inosine           | 0.31   | 0.79   | 0.57   | 0.68   | 1.12    | 1.12   | 0.96   | 0.68   | 0.42   | 1.25   | 0.93   | 0.59   | 0.57   | 0.70   | 0.34   |
| 21  | Gallic acid       | 0.57   | 0.74   | 0.55   | 1.98   | 2.85    | 12.69  | 2.48   | 2.10   | 1.77   | 1.16   | 3.48   | 0.55   | 2.01   | 0.88   | 0.45   |
| 22  | 2'-Deoxyguanosine | 0.06   | 0.08   | 0.07   | 0.08   | 0.22    | 0.19   | 0.19   | 0.16   | 0.05   | 0.11   | 0.09   | 0.11   | 0.09   | 0.07   | 0.06   |
| 23  | Isoleucine        | 14.22  | 20.21  | 20.90  | 20.55  | 26.23   | 30.83  | 34.26  | 32.67  | 16.95  | 14.63  | 14.78  | 30.02  | 27.03  | 36.52  | 24.33  |



|    |                           |        |        |        |        |        |        |        |        |        |         |         |        |        |        |        |
|----|---------------------------|--------|--------|--------|--------|--------|--------|--------|--------|--------|---------|---------|--------|--------|--------|--------|
| 24 | 2'-Deoxyinosine           | 0.12   | 0.17   | 0.12   | 0.14   | 0.14   | 0.14   | 0.23   | 0.16   | 0.28   | 0.18    | 0.20    | 0.13   | 0.12   | 0.14   | 0.13   |
| 25 | Leucine                   | 19.37  | 42.03  | 44.01  | 43.00  | 63.96  | 73.00  | 83.78  | 71.58  | 35.50  | 28.00   | 30.67   | 63.55  | 59.58  | 83.30  | 70.76  |
| 26 | Thymidine                 | 0.56   | 0.56   | 0.53   | 0.54   | 0.93   | 1.01   | 0.91   | 0.98   | 0.58   | 0.71    | 0.66    | 1.06   | 0.89   | 0.46   | 0.55   |
| 27 | Phenylalanine             | 194.92 | 232.64 | 244.30 | 238.38 | 225.61 | 250.67 | 237.34 | 254.33 | 218.75 | 216.75  | 219.92  | 335.27 | 288.17 | 244.65 | 239.55 |
| 28 | Protocatechuic acid       | 2.92   | 1.75   | 2.21   | 0.65   | 10.89  | 3.08   | 1.77   | 1.58   | 3.98   | 3.75    | 1.41    | 1.65   | 0.62   | 1.29   | 0.94   |
| 29 | Neochlorogenic acid       | 0.90   | 0.77   | 0.57   | 0.67   | 1.19   | 0.97   | 1.12   | 1.24   | 0.36   | 0.64    | 0.47    | 1.42   | 1.44   | 0.22   | 0.04   |
| 30 | Procyanidin B2            | 979.61 | 705.42 | 482.60 | 593.75 | 704.58 | 831.67 | 36.51  | 79.83  | 119-   | 1277.50 | 1127.50 | 930.74 | 970.83 | 272.66 | 470.09 |
| 31 | 3,4-Dihydroxybenzaldehyde | 0.70   | 0.63   | 0.90   | 0.76   | 1.65   | 1.77   | 1.90   | 1.82   | 1.92   | 1.28    | 1.45    | 0.43   | 0.66   | 0.18   | 0.15   |
| 32 | Epigallocatechin          | 3.20   | 2.53   | 3.48   | 3.00   | 0.27   | 0.27   | 0.08   | 0.10   | 2.43   | 0.09    | 0.11    | 2.02   | 2.26   | 0.51   | 0.38   |
| 33 | Catechin                  | 157.94 | 162.35 | 243.55 | 202.88 | 432.24 | 396.67 | 18.58  | 20.56  | 252.50 | 262.50  | 249.83  | 267.71 | 233.08 | 93.56  | 91.52  |
| 34 | Procyanidin B1            | 1.05   | 0.80   | 0.65   | 0.72   | 0.91   | 0.90   | 0.43   | 0.43   | 1.26   | 1.07    | 1.09    | 1.00   | 0.73   | 0.55   | 0.48   |
| 35 | Chlorogenic acid          | 0.08   | 0.05   | 0.09   | 0.07   | 0.26   | 0.16   | 0.12   | 0.12   | 0.14   | 0.11    | 0.12    | 0.06   | 0.08   | 0.13   | 0.24   |
| 36 | Cryptochlorogenic acid    | 0.19   | 0.70   | 0.37   | 0.54   | 1.06   | 1.36   | 2.98   | 2.88   | 0.08   | 0.06    | 0.23    | 0.05   | 0.06   | 0.79   | 2.35   |
| 37 | Caffeic acid              | 1.17   | 1.52   | 1.02   | 1.27   | 2.55   | 2.56   | 1.05   | 1.12   | 1.34   | 1.24    | 1.23    | 0.75   | 0.79   | 1.56   | 0.81   |
| 38 | Epicatechin               | 8.90   | 12.86  | 5.48   | 9.16   | 9.67   | 9.53   | 2.93   | 3.42   | 11.70  | 7.75    | 8.89    | 7.51   | 6.59   | 2.93   | 2.63   |
| 39 | Polydatin                 | 7.90   | 2.60   | 2.93   | 2.76   | 11.72  | 10.08  | 1.77   | 1.67   | 3.15   | 2.05    | 2.42    | 2.88   | 2.43   | 17.04  | 6.58   |
| 40 | Orientin                  | -      | -      | -      | -      | 0.02   | 0.01   | 0.02   | 0.01   | 0.02   | -       | -       | 0.02   | 0.02   | 0.61   | 0.50   |
| 41 | Isoorientin               | -      | -      | -      | -      | -      | -      | -      | -      | -      | -       | -       | -      | -      | 0.05   | -      |
| 42 | Piceatannol               | 5.75   | 100.81 | 119.27 | 11-    | 16.44  | 21.70  | 1.40   | 1.73   | 6.38   | 0.55    | 2.50    | 4.75   | 4.49   | 4.50   | 2.21   |
| 43 | Vitexin                   | 0.01   | 0.05   | 0.06   | 0.05   | 0.09   | 0.07   | 0.09   | 0.05   | 0.12   | 0.10    | 0.09    | 0.03   | 0.03   | 1.89   | 1.40   |
| 44 | Vitexin-2''-O-rhamnoside  | 0.07   | 0.07   | 0.06   | 0.07   | 0.07   | 0.08   | 0.06   | 0.06   | 0.17   | 0.09    | 0.11    | 0.09   | 0.08   | 0.07   | 0.05   |
| 45 | Isovitexin                | -      | -      | -      | -      | 0.02   | 0.01   | -      | -      | 0.03   | 0.06    | 0.04    | -      | -      | 2.42   | 2.60   |
| 46 | Hyperoside                | -      | -      | -      | -      | -      | -      | -      | -      | 0.19   | 0.14    | 0.15    | -      | -      | -      | -      |
| 47 | Aromadendrin              | 0.20   | 0.26   | 0.25   | 0.25   | 0.55   | 0.53   | 0.24   | 0.25   | 0.21   | 0.20    | 0.19    | 0.23   | 0.18   | 0.13   | 0.16   |
| 48 | Rutin                     | -      | -      | -      | -      | 1.68   | 1.51   | 9.70   | 13.26  | 0.45   | 0.80    | 0.73    | 0.77   | 0.35   | -      | -      |
| 49 | Isoquercitrin             | -      | -      | -      | -      | -      | -      | 1.91   | 1.47   | 1.79   | 1.46    | 1.77    | -      | -      | -      | -      |
| 50 | Resveratrol               | 0.61   | 12.58  | 9.80   | 11.19  | 1.70   | 3.77   | 0.21   | 0.12   | 6.15   | 0.11    | 2.13    | 0.35   | 0.54   | 1.27   | 1.27   |

|    |              |      |      |      |      |      |      |       |       |      |      |      |      |      |      |      |
|----|--------------|------|------|------|------|------|------|-------|-------|------|------|------|------|------|------|------|
| 51 | Quercitrin   | 0.18 | 0.17 | 0.17 | 0.17 | 0.29 | 0.26 | 0.19  | 0.20  | 0.51 | 0.35 | 0.44 | 0.17 | 0.18 | 0.16 | 0.13 |
| 52 | Astragalin   | 0.04 | 0.04 | 0.05 | 0.04 | 0.17 | 0.15 | 2.49  | 1.94  | 0.53 | 0.57 | 0.51 | 0.05 | 0.04 | 2.53 | 1.13 |
| 53 | Nicotiflorin | 0.09 | 0.16 | 0.14 | 0.15 | 1.29 | 0.86 | 27.26 | 30.75 | 0.23 | 0.24 | 0.23 | 0.39 | 0.35 | 0.17 | 0.09 |
| 54 | Narcissin    | 0.51 | 0.54 | 0.51 | 0.52 | 0.08 | 0.09 | 0.07  | 0.07  | 0.11 | 0.11 | 0.11 | 0.56 | 0.55 | 0.61 | 0.58 |
| 55 | Afzelin      | -    | -    | -    | -    | 0.01 | 0.02 | 0.05  | 0.03  | 0.04 | 0.13 | 0.09 | -    | -    | -    | -    |
| 56 | Quercetin    | 0.28 | 0.19 | 0.16 | 0.18 | 0.37 | 0.43 | 0.38  | 0.44  | 0.36 | 0.29 | 0.29 | 0.14 | 0.13 | 0.53 | 0.41 |
| 57 | Luteolin     | 0.19 | 0.14 | 0.14 | 0.14 | 0.21 | 0.21 | 0.19  | 0.20  | 0.19 | 0.16 | 0.18 | 0.14 | 0.14 | 0.15 | 0.14 |
| 58 | Kaempferol   | 0.31 | 0.34 | 0.30 | 0.32 | 0.33 | 0.34 | 0.36  | 0.42  | 0.43 | 0.32 | 0.36 | 0.31 | 0.30 | 1.04 | 0.61 |
| 59 | Apigenin     | 0.08 | 0.03 | 0.04 | 0.04 | 0.05 | 0.06 | 0.05  | 0.06  | 0.07 | 0.04 | 0.06 | 0.01 | 0.01 | 0.01 | 0.02 |
| 60 | Isorhamnetin | 0.11 | 0.07 | 0.06 | 0.06 | 0.08 | 0.09 | 0.07  | 0.07  | 0.11 | 0.11 | 0.11 | 0.06 | 0.05 | 0.14 | 0.13 |

Note: “-” not detected

Table S1. Contents of 60 constituents in samples. (continued)

| No. | Constituents  | S16    | S17    | S18    | S19    | S20    | S21    | S22    | S23    | S24    | S25    | S26    | S27    | S28    | S29    | S30    |
|-----|---------------|--------|--------|--------|--------|--------|--------|--------|--------|--------|--------|--------|--------|--------|--------|--------|
| 1   | Lysine        | 275.17 | 87.25  | 263.75 | 94.17  | 329.33 | 394.92 | 391.25 | 529.58 | 138.13 | 78.33  | 129.83 | 68.76  | 80.35  | 59.75  | 80.33  |
| 2   | Histidine     | 36.27  | 18.60  | 38.13  | 31.13  | 53.67  | 68.74  | 65.38  | 54.21  | 37.88  | 18.24  | 40.77  | 12.65  | 14.74  | 16.48  | 15.79  |
| 3   | Glycine       | 16.63  | 13.50  | 15.15  | 11.04  | 6.56   | 4.97   | 6.56   | 9.94   | 5.39   | 14.24  | 8.05   | 3.38   | 8.09   | 9.58   | 10.45  |
| 4   | Serine        | 60.04  | 64.00  | 62.50  | 55.17  | 63.25  | 91.23  | 76.38  | 89.43  | 39.75  | 40.29  | 33.52  | 36.01  | 42.51  | 49.25  | 42.50  |
| 5   | Alanine       | 550.33 | 272.50 | 513.75 | 250.83 | 552.52 | 637.37 | 552.50 | 639.49 | 488.33 | 432.93 | 457.77 | 285.06 | 233.20 | 159.50 | 233.17 |
| 6   | Aspartic acid | 54.28  | 16.28  | 53.13  | 23.81  | 55.95  | 76.23  | 74.25  | 70.94  | 33.25  | 24.47  | 30.27  | 31.26  | 36.59  | 35.75  | 36.58  |
| 7   | Threonine     | 92.81  | 27.75  | 79.63  | 37.00  | 41.09  | 29.74  | 41.08  | 67.20  | 21.70  | 28.53  | 21.44  | 20.58  | 24.36  | 25.50  | 26.25  |
| 8   | Glutamic acid | 13.56  | 11.63  | 12.11  | 9.61   | 31.01  | 38.74  | 41.38  | 46.96  | 21.53  | 13.59  | 14.28  | 11.70  | 20.31  | 36.50  | 24.61  |
| 9   | Cysteine      | 0.84   | 6.73   | 1.50   | 3.68   | 0.66   | 0.63   | 0.62   | 0.44   | 2.32   | 2.35   | 3.20   | 2.03   | 1.43   | 1.52   | 1.43   |
| 10  | Proline       | 362.72 | 31-    | 323.75 | 335.83 | 606.69 | 647.37 | 673.75 | 289.77 | 370.25 | 160.91 | 405.24 | 520.10 | 529.24 | 515.00 | 529.17 |
| 11  | Cytidine      | 4.20   | 3.58   | 3.95   | 4.61   | 6.28   | 7.82   | 7.71   | 11.69  | 3.57   | 1.98   | 4.28   | 1.11   | 2.40   | 2.17   | 2.40   |
| 12  | Uracil        | 10.76  | 68.50  | 8.75   | 42.00  | 9.31   | 11.05  | 11.80  | 9.92   | 15.14  | 20.27  | 15.01  | 15.25  | 18.83  | 31.25  | 18.83  |

|    |                           |        |         |        |        |        |        |        |        |        |        |        |        |        |        |        |
|----|---------------------------|--------|---------|--------|--------|--------|--------|--------|--------|--------|--------|--------|--------|--------|--------|--------|
| 13 | Valine                    | 113.07 | 56.50   | 111.75 | 55.50  | 76.09  | 75.73  | 83.25  | 61.70  | 79.17  | 89.34  | 59.79  | 83.77  | 89.26  | 75.55  | 89.25  |
| 14 | Hypoxanthine              | 8.20   | 43.00   | 7.94   | 54.83  | 12.70  | 12.27  | 10.51  | 11.99  | 31.46  | 21.15  | 32.52  | 17.65  | 19.12  | 20.60  | 19.12  |
| 15 | Uridine                   | 9.36   | 26.25   | 10.54  | 17.50  | 12.41  | 15.92  | 13.60  | 33.22  | 15.03  | 19.27  | 15.43  | 20.35  | 17.61  | 16.15  | 17.61  |
| 16 | Adenosine                 | 13.76  | 92.25   | 12.63  | 61.33  | 82.25  | 97.23  | 107.63 | 48.71  | 109.33 | 92.40  | 107.81 | 39.51  | 46.84  | 49.50  | 46.83  |
| 17 | 2'-Deoxyadenosine         | 0.08   | 0.08    | 0.08   | 0.08   | 0.09   | 0.09   | 0.09   | 0.09   | 0.12   | 0.11   | 0.08   | 0.13   | 0.15   | 0.13   | 0.15   |
| 18 | Tyrosine                  | 27.27  | 17.08   | 30.38  | 26.36  | 29.67  | 36.49  | 38.25  | 110.66 | 48.37  | 23.37  | 61.54  | 5.03   | 14.71  | 20.30  | 14.71  |
| 19 | Guanosine                 | 17.21  | 6.63    | 15.15  | 6.45   | 18.47  | 22.77  | 22.13  | 21.26  | 6.99   | 3.65   | 8.36   | 4.33   | 7.28   | 9.40   | 7.28   |
| 20 | Inosine                   | 0.89   | 3.58    | 0.94   | 3.83   | 0.66   | 0.73   | 0.78   | 0.59   | 0.89   | 0.68   | 0.96   | 0.56   | 0.90   | 0.99   | 0.90   |
| 21 | Gallic acid               | 0.35   | 0.41    | 1.83   | 8.21   | 0.78   | 1.34   | 1.79   | 0.46   | 2.51   | 0.55   | 0.94   | 1.30   | 1.76   | 2.78   | 5.98   |
| 22 | 2'-Deoxyguanosine         | 0.12   | 0.09    | 0.12   | 0.19   | 0.26   | 0.36   | 0.33   | 0.08   | 0.13   | 0.06   | 0.13   | 0.15   | 0.35   | 0.41   | 0.35   |
| 23 | Isoleucine                | 25.77  | 22.03   | 24.41  | 21.10  | 29.79  | 35.49  | 33.88  | 53.21  | 23.42  | 24.37  | 22.51  | 16.30  | 18.74  | 19.65  | 18.73  |
| 24 | 2'-Deoxyinosine           | 0.16   | 0.20    | 0.14   | 0.18   | 0.16   | 0.18   | 0.18   | 0.15   | 0.15   | 0.13   | 0.16   | 0.25   | 0.25   | 0.22   | 0.25   |
| 25 | Leucine                   | 58.03  | 54.25   | 51.88  | 47.08  | 70.59  | 75.73  | 74.50  | 109.16 | 54.58  | 50.30  | 47.28  | 36.26  | 42.59  | 45.50  | 42.58  |
| 26 | Thymidine                 | 0.72   | 0.91    | 0.74   | 0.81   | 0.87   | 1.16   | 1.05   | 0.99   | 0.90   | 0.75   | 1.03   | 0.82   | 0.81   | 0.82   | 0.81   |
| 27 | Phenylalanine             | 242.15 | 345.00  | 243.63 | 334.17 | 192.01 | 187.96 | 218.00 | 244.55 | 289.17 | 315.32 | 295.18 | 119.77 | 133.85 | 127.25 | 133.83 |
| 28 | Protocatechuic acid       | 2.22   | 10.43   | 0.44   | 0.79   | 1.65   | 1.58   | 0.87   | 1.57   | 1.09   | 2.14   | 2.43   | 6.10   | 6.02   | 4.75   | 1.76   |
| 29 | Neochlorogenic acid       | 0.44   | 0.82    | 0.39   | 0.76   | 0.50   | 0.50   | 0.52   | 0.04   | 1.02   | 0.70   | 0.71   | 0.18   | 0.25   | 0.36   | 0.25   |
| 30 | Procyanidin B2            | 502.80 | 1272.50 | 448.75 | 866.67 | 551.24 | 567.39 | 732.50 | 233.06 | 131.50 | 159.91 | 126.83 | 91.27  | 112.10 | 110.75 | 112.08 |
| 31 | 3,4-Dihydroxybenzaldehyde | 0.47   | 2.65    | 0.48   | 2.87   | 0.25   | 0.22   | 0.27   | 0.07   | 0.55   | 0.59   | 0.58   | 2.12   | 1.70   | 1.54   | 1.70   |
| 32 | Epigallocatechin          | 0.30   | 0.05    | 0.34   | 0.07   | 0.69   | 0.71   | 0.82   | 0.05   | 0.26   | 0.38   | 0.28   | 0.08   | 0.09   | 0.06   | 0.09   |
| 33 | Catechin                  | 88.05  | 128.00  | 84.75  | 129.92 | 132.25 | 152.97 | 165.00 | 99.17  | 61.33  | 46.30  | 72.04  | 30.51  | 31.85  | 49.00  | 31.85  |
| 34 | Procyanidin B1            | 0.50   | 0.80    | 0.54   | 0.73   | 0.57   | 0.63   | 0.61   | 0.44   | 0.43   | 0.44   | 0.45   | 0.45   | 0.46   | 0.43   | 0.46   |
| 35 | Chlorogenic acid          | 0.11   | 0.24    | 0.12   | 0.18   | 0.10   | 0.11   | 0.11   | 0.15   | 0.12   | 0.09   | 0.15   | 0.11   | 0.15   | 0.19   | 0.15   |
| 36 | Cryptochlorogenic acid    | 1.94   | 1.00    | 1.79   | 0.91   | 0.09   | 0.10   | 0.09   | 0.08   | 2.76   | 0.86   | 2.58   | 0.05   | 0.29   | 0.34   | 0.29   |
| 37 | Caffeic acid              | 1.64   | 1.45    | 1.18   | 1.28   | 1.34   | 1.48   | 1.41   | 1.03   | 1.50   | 2.53   | 1.15   | 0.65   | 0.73   | 0.62   | 0.73   |
| 38 | Epicatechin               | 2.63   | 5.68    | 2.71   | 5.38   | 3.11   | 3.77   | 3.58   | 2.28   | 3.68   | 2.88   | 3.58   | 3.23   | 3.17   | 2.36   | 3.17   |
| 39 | Polydatin                 | 8.58   | 6.85    | 8.55   | 5.27   | 9.00   | 10.27  | 10.81  | 2.82   | 2.62   | 2.65   | 1.78   | 1.13   | 1.24   | 1.42   | 1.24   |

|    |                         |       |        |       |        |       |       |       |      |       |       |       |       |       |       |       |
|----|-------------------------|-------|--------|-------|--------|-------|-------|-------|------|-------|-------|-------|-------|-------|-------|-------|
| 40 | Orientin                | 0.05  | -      | 0.07  | -      | 0.03  | -     | 0.04  | -    | 0.01  | 0.02  | 0.01  | 0.01  | 0.04  | 0.09  | 0.04  |
| 41 | Isoorientin             | 0.14  | -      | 0.14  | -      | 0.11  | 0.13  | 0.11  | -    | -     | -     | -     | 0.01  | -     | -     | -     |
| 42 | Piceatannol             | 8.23  | 98.50  | 7.64  | 91.42  | 31.07 | 30.99 | 36.88 | 0.50 | 3.94  | 4.18  | 3.38  | 2.35  | 1.50  | 0.78  | 1.50  |
| 43 | Vitexin                 | 3.40  | 0.03   | 3.95  | 0.04   | 2.21  | 2.06  | 2.55  | 0.88 | 0.09  | 0.11  | 0.08  | 0.08  | 0.13  | 0.23  | 0.13  |
| 44 | Vitexin-2"-O-rhamnoside | 0.06  | 0.06   | 0.06  | 0.08   | 0.06  | 0.05  | 0.06  | 0.07 | 0.07  | 0.06  | 0.09  | 0.07  | 0.07  | 0.08  | 0.07  |
| 45 | Isovitexin              | 4.00  | -      | 4.25  | -      | 1.83  | 1.73  | 1.64  | 1.14 | 0.04  | -     | 0.09  | 0.22  | 0.17  | 0.11  | 0.17  |
| 46 | Hyperoside              | -     | 0.08   | -     | 0.03   | -     | -     | -     | -    | -     | -     | -     | 0.14  | 0.22  | 0.25  | 0.13  |
| 47 | Aromadendrin            | 0.13  | 1.23   | 0.13  | 1.15   | 0.21  | 0.28  | 0.23  | 0.14 | 0.14  | 0.15  | 0.16  | 0.32  | 0.30  | 0.24  | 0.30  |
| 48 | Rutin                   | 0.98  | 315.00 | 1.14  | 274.67 | 0.14  | 0.20  | 0.11  | 0.45 | 37.75 | 29.78 | 37.77 | 27.51 | 31.17 | 28.50 | 31.17 |
| 49 | Isoquercitrin           | 8.13  | 74.50  | 6.89  | 74.50  | 1.62  | 2.27  | 2.42  | -    | -     | -     | -     | 5.93  | 6.30  | 4.45  | 6.30  |
| 50 | Resveratrol             | 0.72  | 7.68   | 0.50  | 4.29   | 0.41  | 0.62  | 0.51  | 0.42 | 0.52  | 0.84  | 0.19  | 0.92  | 0.35  | 0.11  | 0.35  |
| 51 | Quercitrin              | 0.29  | 0.26   | 0.27  | 0.25   | 0.18  | 0.18  | 0.18  | 0.20 | 0.32  | 0.30  | 0.32  | 0.34  | 0.53  | 0.82  | 0.53  |
| 52 | Astragalin              | 26.27 | 56.50  | 23.15 | 64.83  | 10.28 | 11.50 | 12.25 | 1.31 | 0.40  | 0.20  | 0.61  | 2.45  | 2.60  | 2.39  | 2.60  |
| 53 | Nicotiflorin            | 1.45  | 482.50 | 1.22  | 421.67 | 0.33  | 0.40  | 0.43  | 0.65 | 25.64 | 18.69 | 29.02 | 35.01 | 48.84 | 48.75 | 48.83 |
| 54 | Narcissin               | 0.60  | 0.17   | 0.61  | 0.15   | 0.53  | 0.51  | 0.52  | 0.56 | 0.09  | 0.10  | 0.09  | 0.09  | 0.08  | 0.07  | 0.08  |
| 55 | Afzelin                 | -     | -      | -     | 0.01   | -     | -     | -     | -    | 0.01  | 0.01  | 0.02  | 0.13  | 0.10  | 0.06  | 0.10  |
| 56 | Quercetin               | 1.23  | 10.53  | 1.11  | 7.40   | 0.61  | 0.53  | 0.60  | 0.13 | 0.40  | 0.41  | 0.40  | 0.70  | 0.40  | 0.19  | 0.40  |
| 57 | Luteolin                | 0.15  | 0.30   | 0.14  | 0.28   | 0.14  | 0.14  | 0.14  | 0.15 | 0.17  | 0.16  | 0.17  | 0.22  | 0.20  | 0.17  | 0.20  |
| 58 | Kaempferol              | 2.17  | 6.38   | 1.82  | 4.64   | 0.84  | 0.96  | 0.89  | 0.39 | 0.41  | 0.44  | 0.38  | 0.49  | 0.45  | 0.40  | 0.45  |
| 59 | Apigenin                | 0.04  | 0.10   | 0.04  | 0.10   | 0.02  | 0.01  | 0.01  | 0.02 | 0.06  | 0.06  | 0.06  | 0.07  | 0.07  | 0.08  | 0.07  |
| 60 | Isorhamnetin            | 0.22  | 0.17   | 0.19  | 0.15   | 0.14  | 0.16  | 0.16  | 0.06 | 0.09  | 0.10  | 0.09  | 0.09  | 0.08  | 0.07  | 0.08  |

Note: "-" not detected.

Table S1. Contents of 60 constituents in samples. (continued)

| No. | Constituents      | S31    | S32    | S33    | S34    | S35    | S36    | S37    | S38    | S39    | S40    | S41    | S42    | S43    | S44    | S45    | S46    | S47    |
|-----|-------------------|--------|--------|--------|--------|--------|--------|--------|--------|--------|--------|--------|--------|--------|--------|--------|--------|--------|
| 1   | Lysine            | 14.52  | 63.72  | 90.73  | 144.47 | 171.25 | 5.17   | 12.22  | 13.20  | 15.24  | 13.21  | 14.23  | 228.57 | 205.50 | 49.96  | 77.95  | 44.29  | 54.00  |
| 2   | Histidine         | 6.95   | 7.80   | 8.20   | 12.60  | 15.65  | 3.45   | 28.24  | 19.38  | 5.67   | 9.68   | 7.68   | 19.73  | 19.81  | 12.47  | 12.02  | 7.81   | 9.71   |
| 3   | Glycine           | 4.87   | 2.43   | 9.07   | 7.57   | 8.63   | 1.52   | 2.24   | 2.56   | 2.87   | 3.88   | 3.38   | 5.37   | 5.87   | 4.30   | 3.47   | 3.05   | 2.64   |
| 4   | Serine            | 19.52  | 15.34  | 49.49  | 56.74  | 57.75  | 2.72   | 8.80   | 10.01  | 8.52   | 3.60   | 6.06   | 34.47  | 37.42  | 17.31  | 28.73  | 14.41  | 18.64  |
| 5   | Alanine           | 377.35 | 201.92 | 112.73 | 106.98 | 119.17 | 96.96  | 63.22  | 96.75  | 62.71  | 67.79  | 65.25  | 103.92 | 117.08 | 272.28 | 117.93 | 83.57  | 103.13 |
| 6   | Aspartic acid     | 17.94  | 5.32   | 18.00  | 29.99  | 31.88  | 11.30  | 15.59  | 16.45  | 41.23  | 38.52  | 39.88  | 42.97  | 45.88  | 73.94  | 16.27  | 13.01  | 15.28  |
| 7   | Threonine         | 23.32  | 8.55   | 13.60  | 12.32  | 14.17  | 4.05   | 8.35   | 11.29  | 19.89  | 18.66  | 19.28  | 13.54  | 13.86  | 32.97  | 18.76  | 17.09  | 20.16  |
| 8   | Glutamic acid     | 2.10   | 3.15   | 7.02   | 10.67  | 12.26  | 3.00   | 7.92   | 10.51  | 31.73  | 32.27  | 32.00  | 24.16  | 24.40  | 66.20  | 19.51  | 19.42  | 24.45  |
| 9   | Cysteine          | 0.69   | 9.00   | 3.47   | 1.89   | 2.30   | 0.65   | 0.94   | 0.97   | 1.46   | 4.70   | 3.08   | 1.23   | 1.59   | 3.40   | 1.07   | 0.50   | 1.87   |
| 10  | Proline           | 80.47  | 86.72  | 454.91 | 469.91 | 528.33 | 175.43 | 140.19 | 290.13 | 674.60 | 615.37 | 645.00 | 484.61 | 531.25 | 189.35 | 689.59 | 562.95 | 688.33 |
| 11  | Cytidine          | 1.79   | 0.64   | 1.84   | 3.65   | 3.88   | 1.96   | 3.70   | 4.69   | 5.32   | 3.63   | 4.48   | 2.14   | 1.93   | 1.40   | 1.56   | 1.18   | 1.43   |
| 12  | Uracil            | 3.95   | 13.27  | 12.10  | 13.20  | 14.28  | 5.97   | 5.10   | 13.68  | 10.12  | 5.15   | 7.64   | 8.94   | 7.93   | 1.27   | 5.70   | 4.68   | 6.12   |
| 13  | Valine            | 48.73  | 19.99  | 87.48  | 65.74  | 89.17  | 19.17  | 18.34  | 17.90  | 19.54  | 14.53  | 17.04  | 38.97  | 46.50  | 7-     | 28.48  | 23.94  | 44.98  |
| 14  | Hypoxanthine      | 8.17   | 19.67  | 21.10  | 28.74  | 39.20  | 11.70  | 14.07  | 18.34  | 30.48  | 22.56  | 26.53  | 51.71  | 60.50  | 17.39  | 6.77   | 7.21   | 10.43  |
| 15  | Uridine           | 13.17  | 3.50   | 29.74  | 11.22  | 20.68  | 4.50   | 14.62  | 19.66  | 21.74  | 16.91  | 19.33  | 7.94   | 8.71   | 8.47   | 7.27   | 5.63   | 10.05  |
| 16  | Adenosine         | 30.24  | 8.57   | 48.74  | 42.24  | 55.00  | 18.42  | 37.98  | 69.13  | 27.73  | 34.02  | 30.88  | 47.21  | 52.25  | 24.41  | 27.98  | 13.84  | 22.98  |
| 17  | 2'-Deoxyadenosine | 0.09   | 0.08   | 0.09   | 0.10   | 0.12   | 0.07   | 0.14   | 0.18   | 0.19   | 0.18   | 0.18   | 0.16   | 0.18   | 0.08   | 0.11   | 0.11   | 0.13   |
| 18  | Tyrosine          | 2.87   | 2.70   | 8.72   | 20.35  | 22.86  | 2.46   | 11.97  | 14.95  | 14.14  | 11.18  | 12.66  | 22.91  | 24.09  | 17.76  | 42.97  | 30.77  | 40.42  |
| 19  | Guanosine         | 7.70   | 1.17   | 6.45   | 9.05   | 10.08  | 2.75   | 1.36   | 4.07   | 1.74   | 2.18   | 1.96   | 10.52  | 11.59  | 4.15   | 5.87   | 5.18   | 6.01   |
| 20  | Inosine           | 0.39   | 0.34   | 0.58   | 0.63   | 0.74   | 0.36   | 1.21   | 1.64   | 0.48   | 0.29   | 0.39   | 1.31   | 1.43   | 0.58   | 1.34   | 1.36   | 1.48   |
| 21  | Gallic acid       | 0.43   | 0.77   | 0.44   | 0.48   | 4.06   | 0.38   | 0.41   | 10.51  | 3.27   | 3.20   | 16.09  | 1.54   | 4.89   | 3.42   | 2.37   | 0.75   | 8.73   |
| 22  | 2'-Deoxyguanosine | 0.06   | 0.07   | 0.07   | 0.15   | 0.15   | 0.05   | 0.07   | 0.08   | 0.14   | 0.17   | 0.15   | 0.14   | 0.15   | 0.05   | 0.11   | 0.12   | 0.12   |
| 23  | Isoleucine        | 8.80   | 5.70   | 19.92  | 16.95  | 21.38  | 2.70   | 4.15   | 6.49   | 8.39   | 7.40   | 7.90   | 12.42  | 13.01  | 17.64  | 13.17  | 9.38   | 14.99  |
| 24  | 2'-Deoxyinosine   | 0.11   | 0.13   | 0.25   | 0.25   | 0.25   | 0.11   | 0.12   | 0.15   | 0.17   | 0.17   | 0.17   | 0.17   | 0.16   | 0.13   | 0.21   | 0.17   | 0.18   |
| 25  | Leucine           | 21.87  | 13.42  | 39.24  | 31.74  | 42.17  | 5.72   | 9.10   | 10.75  | 17.46  | 13.91  | 15.69  | 21.51  | 23.76  | 28.98  | 17.61  | 13.51  | 22.00  |

|    |                           |       |       |        |        |        |       |       |        |       |       |       |        |        |        |        |        |        |
|----|---------------------------|-------|-------|--------|--------|--------|-------|-------|--------|-------|-------|-------|--------|--------|--------|--------|--------|--------|
| 26 | Thymidine                 | 0.47  | 0.49  | 0.69   | 0.58   | 0.71   | 0.76  | 0.70  | 0.87   | 1.32  | 0.97  | 1.14  | 0.69   | 0.71   | 0.62   | 0.67   | 0.59   | 0.66   |
| 27 | Phenylalanine             | 72.72 | 47.23 | 200.96 | 186.71 | 234.25 | 25.74 | 61.73 | 60.50  | 27.48 | 28.77 | 28.13 | 157.87 | 172.13 | 205.34 | 116.93 | 77.06  | 121.00 |
| 28 | Protocatechuic acid       | 4.60  | 1.80  | 3.97   | 3.22   | 0.90   | 10.17 | 9.90  | 0.49   | 18.26 | 13.91 | 3.24  | 4.45   | 1.52   | 5.70   | 15.19  | 6.13   | 3.47   |
| 29 | Neochlorogenic acid       | 0.32  | 1.56  | 0.41   | 0.31   | 0.27   | 0.03  | 0.03  | 0.03   | 0.11  | 0.01  | 0.06  | 0.26   | 0.32   | 0.03   | 0.46   | 0.39   | 0.78   |
| 30 | Procyanidin B2            | 79.97 | 14.92 | 279.94 | 193.96 | 243.00 | 70.72 | 73.22 | 64.50  | 32.48 | 15.03 | 23.76 | 359.71 | 365.00 | 162.12 | 196.63 | 310.25 | 503.33 |
| 31 | 3,4-Dihydroxybenzaldehyde | 1.64  | 1.04  | 2.38   | 2.41   | 2.66   | 1.43  | 0.78  | 1.02   | 1.50  | 0.59  | 1.05  | 2.50   | 2.85   | 1.54   | 4.55   | 4.18   | 6.03   |
| 32 | Epigallocatechin          | 0.06  | 0.06  | 0.08   | 0.11   | 0.08   | 0.05  | 0.07  | 0.10   | 0.06  | 0.08  | 0.07  | 0.06   | 0.08   | 0.06   | 0.06   | 0.07   | 0.11   |
| 33 | Catechin                  | 10.12 | 6.57  | 31.24  | 50.24  | 52.83  | 12.07 | 7.87  | 17.19  | 5.15  | 4.83  | 4.99  | 83.68  | 78.00  | 44.46  | 107.44 | 82.82  | 117.33 |
| 34 | Procyanidin B1            | 0.38  | 0.36  | 0.52   | 0.47   | 0.52   | 0.39  | 0.39  | 0.40   | 0.35  | 0.34  | 0.34  | 0.55   | 0.55   | 0.46   | 0.51   | 0.59   | 0.97   |
| 35 | Chlorogenic acid          | 0.07  | 0.12  | 0.12   | 0.16   | 0.14   | 0.09  | 0.07  | 0.07   | 0.07  | 0.05  | 0.06  | 0.12   | 0.14   | 0.06   | 0.24   | 0.19   | 0.17   |
| 36 | Cryptochlorogenic acid    | 0.24  | 0.91  | 0.38   | 0.98   | 0.65   | 0.25  | 0.28  | 0.33   | 0.34  | 0.20  | 0.27  | 0.48   | 0.47   | 0.05   | 0.54   | 0.37   | 0.40   |
| 37 | Caffeic acid              | 1.24  | 1.15  | 0.69   | 0.85   | 0.85   | 0.76  | 1.09  | 0.93   | 1.34  | 1.13  | 1.24  | 0.76   | 0.80   | 1.79   | 0.81   | 0.47   | 0.60   |
| 38 | Epicatechin               | 1.47  | 2.15  | 3.25   | 3.05   | 3.31   | 1.31  | 1.26  | 1.73   | 1.13  | 0.93  | 1.03  | 4.25   | 4.20   | 1.53   | 7.27   | 5.60   | 8.89   |
| 39 | Polydatin                 | 0.97  | 0.57  | 4.52   | 2.50   | 4.01   | 1.25  | 0.74  | 0.96   | 0.81  | 0.90  | 0.86  | 3.42   | 2.98   | 1.54   | 3.65   | 3.98   | 8.59   |
| 40 | Orientin                  | -     | -     | 0.05   | 0.05   | 0.03   | -     | -     | -      | -     | -     | -     | -      | -      | -      | 0.04   | 0.01   | 0.04   |
| 41 | Isoorientin               | -     | -     | -      | -      | -      | -     | -     | -      | -     | -     | -     | -      | -      | -      | 0.02   | -      | -      |
| 42 | Piceatannol               | 9.40  | 0.95  | 7.85   | 3.75   | 6.63   | 6.40  | 3.57  | 5.54   | 2.92  | 0.76  | 1.84  | 0.59   | 0.73   | 57.70  | 4.80   | 10.06  | 29.87  |
| 43 | Vitexin                   | -     | 0.06  | 0.04   | 0.04   | 0.04   | 0.03  | 0.01  | 0.01   | 0.04  | 0.01  | 0.03  | 0.05   | 0.06   | 0.02   | 0.08   | 0.04   | 0.05   |
| 44 | Vitexin-2''-O-rhamnoside  | 0.06  | 0.06  | 0.07   | 0.07   | 0.07   | 0.05  | 0.07  | 0.07   | 0.06  | 0.10  | 0.08  | 0.08   | 0.08   | 0.06   | 0.09   | 0.07   | 0.07   |
| 45 | Isovitexin                | -     | -     | 0.01   | 0.02   | 0.02   | -     | -     | -      | -     | -     | -     | 0.02   | 0.03   | -      | 0.02   | 0.05   | 0.06   |
| 46 | Hyperoside                | -     | -     | 0.23   | 0.30   | 0.32   | -     | -     | -      | -     | -     | -     | 0.30   | 0.26   | -      | 0.23   | 0.19   | 0.26   |
| 47 | Aromadendrin              | 0.56  | 0.24  | 0.54   | 0.38   | 0.51   | 0.12  | 0.15  | 0.21   | 0.10  | 0.08  | 0.09  | 0.23   | 0.23   | 0.43   | 0.24   | 0.31   | 0.55   |
| 48 | Rutin                     | 80.97 | 18.09 | 90.48  | 71.99  | 96.83  | 99.96 | 79.47 | 109.00 | 0.31  | 0.46  | 0.39  | 122.65 | 125.38 | 36.72  | 0.86   | 0.56   | 0.70   |
| 49 | Isoquercitrin             | 14.99 | -     | 34.74  | 21.67  | 32.06  | 48.98 | 25.74 | 42.88  | -     | -     | -     | 11.39  | 10.83  | 15.44  | 16.32  | 17.61  | 28.37  |
| 50 | Resveratrol               | 0.99  | 0.15  | 6.67   | 0.40   | 3.23   | 1.78  | 0.34  | 0.34   | 0.23  | 0.37  | 0.30  | 0.25   | 0.29   | 18.51  | 0.10   | 0.58   | 6.83   |
| 51 | Quercitrin                | 0.22  | 0.20  | 0.75   | 0.52   | 0.72   | 0.20  | 0.17  | 0.17   | 0.18  | 0.16  | 0.17  | 1.17   | 1.16   | 0.14   | 0.30   | 0.28   | 0.37   |
| 52 | Astragalin                | 11.40 | 1.11  | 22.32  | 14.60  | 20.89  | 28.99 | 15.24 | 17.44  | 1.71  | 1.58  | 1.65  | 9.69   | 9.48   | 13.04  | 4.02   | 6.56   | 9.83   |

|    |              |        |       |        |       |       |        |       |        |      |      |      |       |       |       |      |      |      |
|----|--------------|--------|-------|--------|-------|-------|--------|-------|--------|------|------|------|-------|-------|-------|------|------|------|
| 53 | Nicotiflorin | 106.96 | 22.12 | 100.98 | 70.24 | 98.58 | 121.45 | 71.97 | 100.38 | 0.71 | 0.32 | 0.51 | 53.71 | 57.42 | 63.20 | 0.30 | 0.25 | 0.26 |
| 54 | Narcissin    | 1.91   | 0.06  | 0.10   | 0.13  | 0.11  | 3.07   | 2.16  | 2.61   | 0.58 | 0.55 | 0.57 | 0.11  | 0.11  | 1.03  | 0.10 | 0.10 | 0.10 |
| 55 | Afzelin      | -      | 0.02  | 0.07   | 0.02  | 0.07  | -      | -     | -      | -    | -    | -    | 0.04  | 0.04  | -     | 0.04 | 0.05 | 0.09 |
| 56 | Quercetin    | 5.77   | 0.53  | 2.26   | 0.64  | 1.21  | 6.25   | 1.83  | 2.87   | 0.21 | 0.21 | 0.21 | 0.32  | 0.29  | 4.50  | 0.25 | 0.26 | 0.83 |
| 57 | Luteolin     | 0.23   | 0.18  | 0.23   | 0.21  | 0.21  | 0.17   | 0.16  | 0.17   | 0.17 | 0.18 | 0.17 | 0.18  | 0.19  | 0.20  | 0.19 | 0.21 | 0.22 |
| 58 | Kaempferol   | 1.36   | 0.39  | 1.17   | 0.65  | 0.81  | 1.66   | 0.63  | 0.83   | 0.39 | 0.32 | 0.36 | 0.35  | 0.38  | 1.79  | 0.34 | 0.38 | 0.49 |
| 59 | Apigenin     | 0.06   | 0.03  | 0.11   | 0.12  | 0.11  | 0.07   | 0.03  | 0.04   | 0.01 | 0.04 | 0.03 | 0.08  | 0.08  | 0.05  | 0.07 | 0.09 | 0.10 |
| 60 | Isorhamnetin | 0.08   | 0.06  | 0.10   | 0.13  | 0.11  | 0.21   | 0.13  | 0.15   | 0.07 | 0.08 | 0.07 | 0.11  | 0.13  | 0.10  | 0.10 | 0.10 | 0.10 |

Note: “-” not detected.
